# Supplementary material for: Transcriptomic Insights into the Response of Placenta and Decidua Basalis to the CpG Oligodeoxynucleotide Stimulation in Non-Obese Diabetic Mice and Wild-Type Controls
Source: PubMed Central journal article supplement (PMC5000678; doi:10.3390/ijms17081281), 2016-08-05
Supplement: ijms-17-01281-s001.pdf [file ijms-17-01281-s001.pdf]

# Supplementary Materials: Transcriptomic Insights into the Response of Placenta and Decidua Basalis to the CpG Oligodeoxynucleotide Stimulation in Non-Obese Diabetic Mice and Wild-Type Controls

Xiao-Rui Liu, Yu-Na Guo, Chuan-Mei Qin, Xiao-Li Qin, Fei Tao, Fei Su, Fu-Ju Tian, Yan Zhang and Yi Lin

**Table S1.** Statistics of raw and mapped reads from RNA-Seq analysis in Non-Obese Diabetic Mice (NOD) and Wild-Type Controls (WT) with CpG oligodeoxynucleotide (CpG ODN) or Control ODN.

| Variable                | NOD            |               | WT            |               |
|-------------------------|----------------|---------------|---------------|---------------|
|                         | CpG ODN        | Control ODN   | CpG ODN       | Control ODN   |
| Raw reads               | 50,915,916     | 48,993,770    | 53,112,240    | 42,140,620    |
| Raw nucleotide bases    | 5,142,507,516  | 4,948,370,770 | 5,364,336,240 | 4,256,202,620 |
| ≥Q20 (%) <sup>a</sup>   | 94.87          | 94.97         | 94.81         | 96.57         |
| Hi-Q <sup>b</sup> reads | 48,231,724     | 46,449,852    | 50,378,402    | 40,840,510    |
| Hi-Q nucleotide bases   | 47,264,282,860 | 4,555,716,219 | 4,932,417,478 | 4,036,119,559 |
| ≥Q20 (%)                | 99.12          | 98.86         | 98.79         | 99.14         |
| Mapped reads            | 45,955,512     | 44,248,507    | 48,377,489    | 39,287,064    |
| (Rate)                  | (95.3%)        | (95.3%)       | (96.0%)       | (96.2%)       |

<sup>a</sup> Percent of sequence with error estimates better than  $10^{-2}$  (Q20); <sup>b</sup> Hi-Q is short for high quality.

**Table S2.** Primer sequences used for RT-qPCR.

| Gene Symbol    | Primer Sequences |                            |
|----------------|------------------|----------------------------|
| <i>β-actin</i> | Forward          | TGGCTCCTAGCACCATGAAG       |
|                | Reverse          | AACGCAGCTCAGTAACAGTCC      |
| <i>Adipoq</i>  | Forward          | CCGCTTATGTGTATCGCTCAG      |
|                | Reverse          | CCGTGATGTGGTAAGAGAAGTAGTAG |
| <i>Apoa4</i>   | Forward          | GACCTACGTGACCGCATGAT       |
|                | Reverse          | TCTGCATGCGCTGGATGTAT       |
| <i>Apom</i>    | Forward          | GTGGACATAACCGATTGACTGAAG   |
|                | Reverse          | GTGGTGACCGATTGTAGAGGA      |
| <i>Arg1</i>    | Forward          | CTCCAAGCCAAAGTCCTTAGAG     |
|                | Reverse          | AGGAGCTGTCATTAGGGACATC     |
| <i>Arg2</i>    | Forward          | TCCTCCACGGGCAAATCC         |
|                | Reverse          | GCTGGACCATATTCCACTCCTA     |
| <i>B2m</i>     | Forward          | GAGATGTCAGATATGTCCTTCAGCA  |
|                | Reverse          | TCGATCCCAGTAGACGGTCTT      |
| <i>C1qa</i>    | Forward          | AGGACTGAAGGGCGTGAAAG       |
|                | Reverse          | CGTGTGGTTCTGGTATGGACTC     |
| <i>C1qb</i>    | Forward          | CACACCTGTTACTGCTGCTTCTA    |
|                | Reverse          | CCTTTCTCTCCAAACTCACCAAG    |
| <i>C1qc</i>    | Forward          | GCGATGAGGTGTGGCTATCA       |
|                | Reverse          | GGAAGAGGTCTGAGTGAGGATG     |
| <i>C3</i>      | Forward          | CCAGCTCCCCATTAGCTCTG       |
|                | Reverse          | GCACTTGCCTCTTTAGGAAGTC     |
| <i>Cd74</i>    | Forward          | CTCCGAAATCTGCCAAACC        |
|                | Reverse          | ATCTTCCAGTTCACGCCATC       |

Table S2. Cont.

| Gene Symbol     |         | Primer Sequences           |
|-----------------|---------|----------------------------|
| <i>Ceacam11</i> | Forward | ACTCAGAATGACACAGGGCTTTA    |
|                 | Reverse | GGAAGTAATGGAAGAATCGCAC     |
| <i>Cfb</i>      | Forward | GTCTGATGAGAGGAGTAGCGATG    |
|                 | Reverse | CATGCTATACACAGCCTGGAGA     |
| <i>Cfd</i>      | Forward | CATGCTCGGCCCTACATGG        |
|                 | Reverse | CACAGAGTCGTCATCCGTCAC      |
| <i>Ctsk</i>     | Forward | TTGTGACCGTGATAATGTGAACC    |
|                 | Reverse | TCCGAGCCAAGAGAGCATATC      |
| <i>Cxcl15</i>   | Forward | TCCTGCTGGCTGTCCTTAAC       |
|                 | Reverse | ACTGCTATCACTTCCTTTCTGTTG   |
| <i>Cyp26a1</i>  | Forward | CTCTCCAACCTGCACGATTC       |
|                 | Reverse | TGCTCCAGACAACCTGCTGAC      |
| <i>Ctss</i>     | Forward | CAAGTGGGCATGAACGATATG      |
|                 | Reverse | GTGTCAGGCAATGTCCGATTA      |
| <i>Cybb</i>     | Forward | ATTGTGATAATGCCACCAGTCTG    |
|                 | Reverse | CCAGCCAGTAAGGTAGATATTGTAGC |
| <i>Degs2</i>    | Forward | CTCTTGGCGATGGCTGCTAT       |
|                 | Reverse | GAAGGATGTAGCGTAAGGTAGGC    |
| <i>F10</i>      | Forward | GAGGGACACCTACGACTATGAT     |
|                 | Reverse | GCCCAGTCTTTCTGAGGCA        |
| <i>F2</i>       | Forward | CCGAAAGGGCAACCTAGAGC       |
|                 | Reverse | GGCCAGAACACGTCTGTG         |
| <i>Fcgr4</i>    | Forward | CGAGGACAATTCTATCAAGTGGTT   |
|                 | Reverse | ACTTAGTGGTCTGAAGCAATAGCC   |
| <i>Fgb</i>      | Forward | CAGGATGGGACCCACAGAAC       |
|                 | Reverse | GTTCTCCCCCACCAGTTGAG       |
| <i>H2-D1</i>    | Forward | CTCCGTCCACTGACTCTTAC       |
|                 | Reverse | GAGAACTGAGGGCTCTGGATG      |
| <i>Il10</i>     | Forward | GAAGACAATAACTGCACCCACTT    |
|                 | Reverse | GCAACCCAAGTAACCCTTAAAGT    |
| <i>Itgam</i>    | Forward | GCTTCAGTGCTTCCATTACCTC     |
|                 | Reverse | GAATCCACTCTGGTTGTGTTGAT    |
| <i>Igj</i>      | Forward | ACGACGAAGCGACCATTCT        |
|                 | Reverse | GGGAGGTGGGATCAGAGATATT     |
| <i>Il1r2</i>    | Forward | GCCAGGAATACAACATCACTAGG    |
|                 | Reverse | GGGTAAGCAGCCGAGATAAAC      |
| <i>Klk7</i>     | Forward | GTGCTGGCATTCTGACTCTAA      |
|                 | Reverse | AGACTTGAGTGTAGACGCCTGG     |
| <i>Ltf</i>      | Forward | GGAGCCTTGAGGTGTCTGAGA      |
|                 | Reverse | AGGTGGCACTCCTTGTATTCTG     |
| <i>Masp1</i>    | Forward | CTTCTGTGGGGTAGCCTTTT       |
|                 | Reverse | TGAGCTGTGTAGGGTTGGTTC      |
| <i>Mbl2</i>     | Forward | TGACAGTGGTTTATGCAGAGAC     |
|                 | Reverse | CGTCACGTCCATCTTTGCC        |
| <i>Mgp</i>      | Forward | CTGTGCTACGAATCTCACGAAAG    |
|                 | Reverse | CTTGTTCGTTCTCTGGACTC       |

Table S2. Cont.

| Gene Symbol    | Primer Sequences                  |
|----------------|-----------------------------------|
| <i>Mpeg1</i>   | Forward GACAACCAGAATAGCCAGAACAC   |
|                | Reverse TCTAAGGTGATGCCTGGATAGAAG  |
| <i>NOS2</i>    | Forward GTTCTCAGCCCAACAATACAAGA   |
|                | Reverse GTGGACGGGTCGATGTCAC       |
| <i>Plin1</i>   | Forward TCTCGACACACCATGCAAAC      |
|                | Reverse TCTGGTCGTCATGGCTCTC       |
| <i>Plg</i>     | Forward ATAGGCACAACAGGACACCAGA    |
|                | Reverse GGA CT CGCAGGATGGAATCT    |
| <i>Rbp4</i>    | Forward CGAGTCCGTCTTCTGAGCAA      |
|                | Reverse GCAGAGCGAAGGTGTCGTAG      |
| <i>Retnla</i>  | Forward CGTGGAGAATAAGGTCAAGGAAC   |
|                | Reverse ACGAGTAAGCACAGGCAGTTG     |
| <i>Retn</i>    | Forward TTCAACTCCCTGTTTCAAATG     |
|                | Reverse GGCTGCTGTCCAGTCTATCCT     |
| <i>Ren1</i>    | Forward GACTCCTGGCAGATCACGAT      |
|                | Reverse ACCTGGCTACAGTTCACAACATATT |
| <i>Sla</i>     | Forward GGCTGATGGTCTATGCTGTGT     |
|                | Reverse TCTGCTCCCTCTGAACCTTCT     |
| <i>Smpd1</i>   | Forward ATCCCTCCAGGACATTGTCTTAA   |
|                | Reverse GCTAGTGGTCCGGCTCAGAGTT    |
| <i>Sprr2i</i>  | Forward GAAGAAGAGGAACTCCATCTCACAT |
|                | Reverse CAGCAGGATTATCATCTCAGGTTAA |
| <i>Tacstd2</i> | Forward GCTGATGCCGCCTACTACTT      |
|                | Reverse CTACCGCTACCGAGACGACA      |
| <i>Tlr1</i>    | Forward TTGCTGGTGTTAGGAGATGCTTAT  |
|                | Reverse CTGACGGACACATCCAGAAGA     |
| <i>Ttr</i>     | Forward CGTACTGGAAGACA CT TGGCAT  |
|                | Reverse GCCGTGGTGTGTAGGAGTAT      |
| <i>Ubb</i>     | Forward AGTGACGAGAGGCTTTGTCC      |
|                | Reverse CGAAGATCTGCATTTTGACCTGT   |

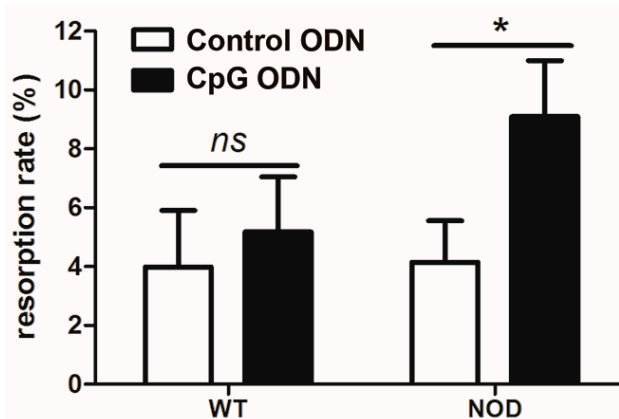

**Figure S1.** CpG ODN-induced embryo-resorption in NOD mice. CpG ODN in 200  $\mu$ L PBS at 25  $\mu$ g/dam was injected intraperitoneally on Embryonic Day 6.5 (E6.5). Control ODN treatment was performed at the same time and dose. Data represent mean of the biological replicates  $\pm$  SEM ( $n = 7$  in control ODN-treated WT mice,  $n = 7$  in CpG ODN-treated WT mice,  $n = 16$  in control ODN-treated NOD mice, and  $n = 14$  in CpG ODN-treated NOD mice), Nonparametric test (Mann-Whitney test), *ns*, not significant; \*  $p < 0.05$ .

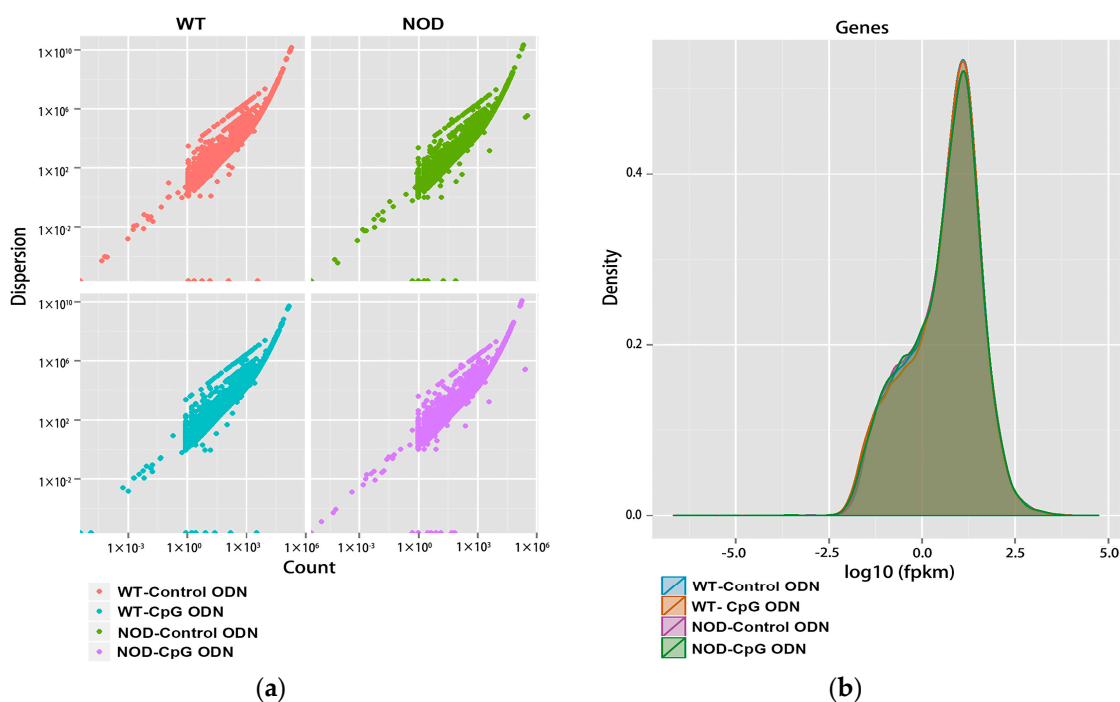

**Figure S2.** Expression pattern of genes from all samples. (a) Count vs. dispersion plot by condition for all genes; (b) Density plot of individual conditions.

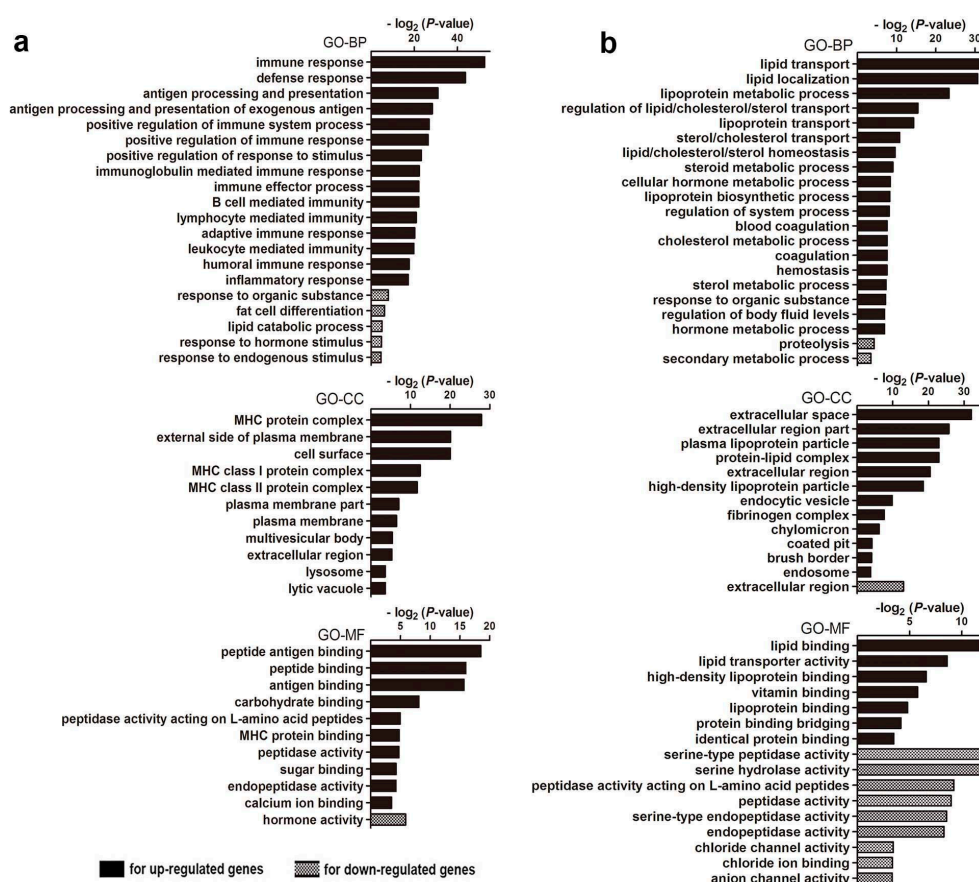

**Figure S3.** Gene ontology (GO) analysis of DEGs in WT and NOD mice treated with control ODN or CpG ODN. Enriched gene ontology (GO) terms with significant *p*-values. (a) are based on the DEGs between CpG ODN and control ODN-treated WT mice; (b) are based on the DEGs between CpG ODN and control ODN-treated NOD mice. GO-BP: biological processes; GO-CC: cellular components; GO-MF: molecular functions.

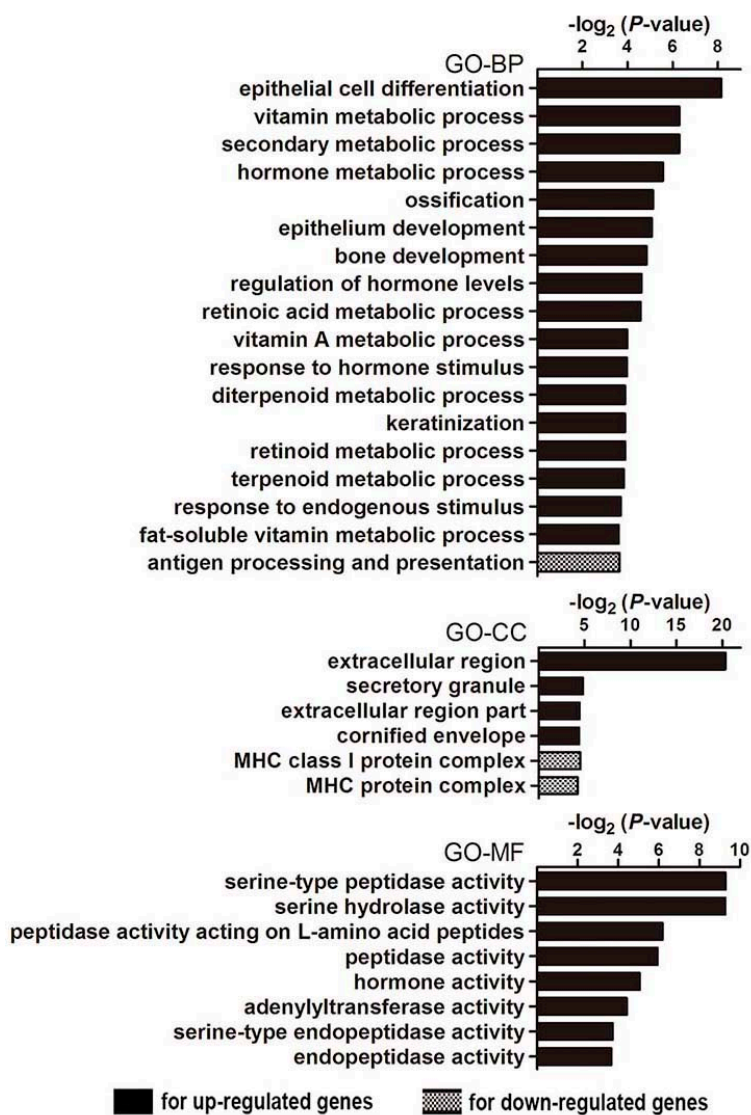

**Figure S4.** GO analysis of DEGs between WT and NOD mice treated with CpG ODN. Enriched GO terms with significant *p*-values. GO-BP: biological processes; GO-CC: cellular components; GO-MF: molecular functions.

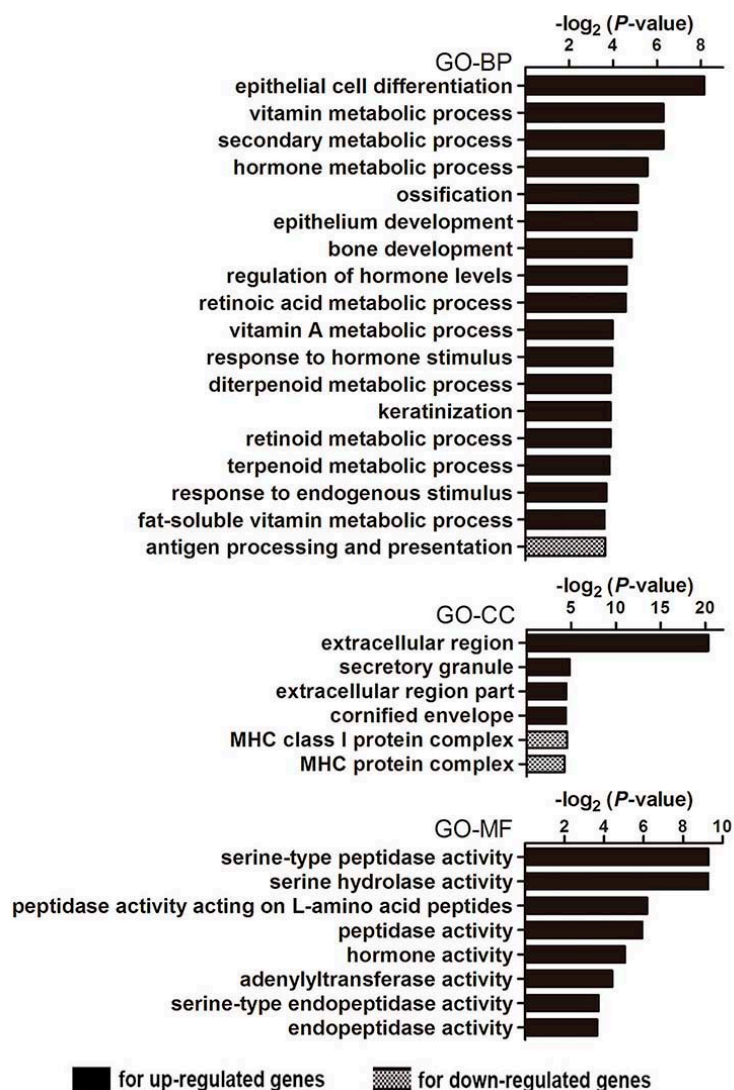

**Figure S5.** GO analysis of DEGs between WT and NOD mice treated with control ODN. Enriched GO terms with significant  $p$ -values. GO-BP: biological processes; GO-CC: cellular components; GO-MF: molecular functions.

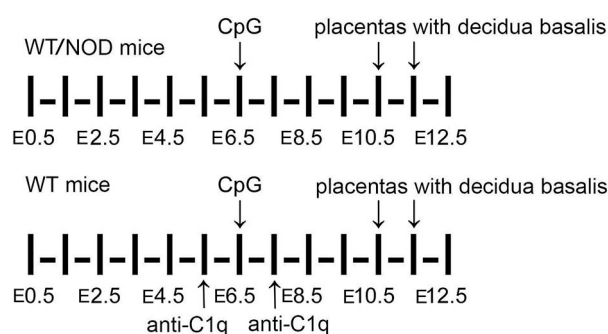

**Figure S6.** Methods for CpG-stimulation and C1q-blocking. To simulated intrauterine infection, CpG ODN was injected intraperitoneally into pregnant mice at a dose of 25  $\mu\text{g}$  on Embryonic Day 6.5 (E6.5). Control mice were injected with control ODN at the same dose and time. For blocking the function of C1q, neutralizing anti-C1q antibody was injected intraperitoneally into pregnant WT mice at a dose of 50  $\mu\text{g}$  on E5.5 and E7.5 with CpG ODN at a dose of 25  $\mu\text{g}$  on E6.5. On E10.5 or E11.5, placentas with decidua basalis were collected separately and immediately frozen in liquid nitrogen.
